# Supplementary material for: Comparative genomic analyses of Streptococcus mutans provide insights into chromosomal shuffling and species-specific content
Source: Springer Nature journal article supplement (doi:10.1186/1471-2164-10-358), 2009-08-05
Supplement: Additional file 1 [file 1471-2164-10-358-s1.pdf]

Additional file 1. General features of *S. mutans* NN2025 and UA159

| Features                             | Strains   |                    |
|--------------------------------------|-----------|--------------------|
|                                      | NN2025    | UA159 <sup>1</sup> |
| Serotype                             | <i>c</i>  | <i>c</i>           |
| Length of sequence                   | 2,013,587 | 2,030,921          |
| G+C content                          | 36.85%    | 36.83%             |
| Open Reading frames                  |           |                    |
| Percentage of coding                 | 85.18%    | 85.82%             |
| Protein coding region                | 1895      | 1960               |
| Average gene length (bp)             | 903.2     | 889.3              |
| RNA                                  |           |                    |
| ribosomal RNA                        | 5         | 5                  |
| transfer RNA                         | 65        | 65                 |
| Tansposon or Insertion sequence (IS) |           |                    |
| full length                          | 6         | 7                  |
| partial                              | 13        | 15                 |

<sup>1</sup>The genomic sequences of *S. mutans* UA159 (NC004350) was obtained through the website of the National Center of Biological Information (NCBI, <http://www.ncbi.nlm.nih.gov>).
